# Supplementary figures and images for: Degradation of ultra-high molecular weight poly(methyl methacrylate-co-butyl acrylate-co-acrylic acid) under ultra violet irradiation
Source: Royal Society of Chemistry journal article supplement (doi:10.1039/c6ra25313j), 2016-12-22

GPC chromatogram of P(MMA-co-BA-co-AA)

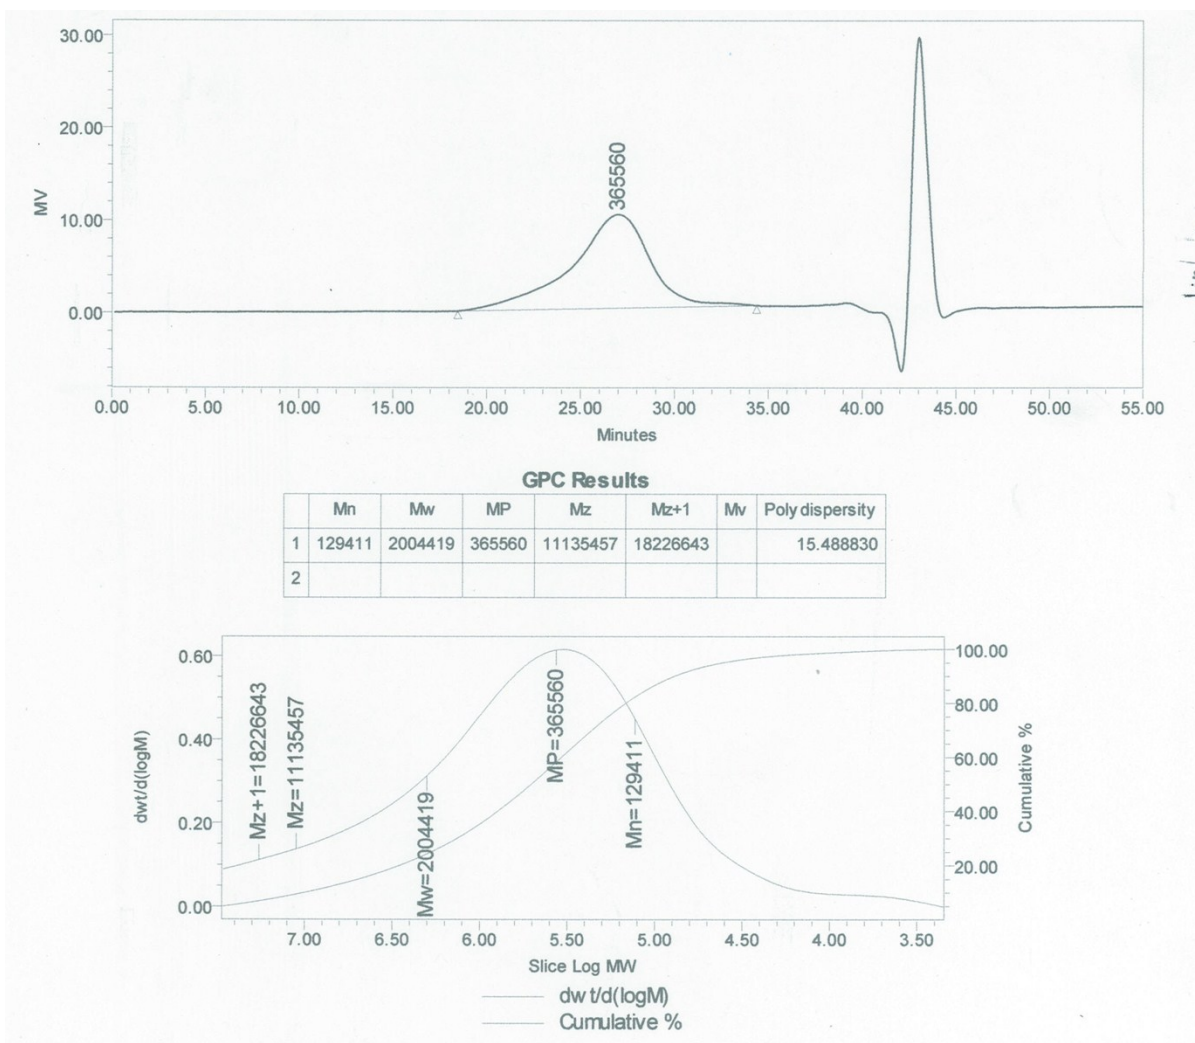

Supplement: c6ra25313j1.pdf [file c6ra25313j1.pdf]
